CORRECTION

# Correction: Discriminating the Difference between Remote and Close Association with Relation to White-Matter Structural Connectivity

Ching-Lin Wu, Suyu Zhong, Hsueh-Chih Chen

The first and third authors' names are spelled incorrectly. The correct name for the first author is: Ching-Lin Wu. The correct name for the third author is: Hsueh-Chih Chen. The correct citation is: Wu C-L, Zhong S, Chen H-C (2016) Discriminating the Difference between Remote and Close Association with Relation to White-Matter Structural Connectivity. PLoS ONE 11(10): e0165053. doi:[10.1371/journal.pone.0165053](https://doi.org/10.1371/journal.pone.0165053)

There is also an error in affiliation 1 for authors Ching-Lin Wu and Hsueh-Chih Chen. Affiliation 1 should be: Department of Educational Psychology and Counseling, National Taiwan Normal University, Taipei, 10610, Taiwan.

## Reference

1. Wu C, Zhong S, Chen H (2016) Discriminating the Difference between Remote and Close Association with Relation to White-Matter Structural Connectivity. PLoS ONE 11(10): e0165053. doi:[10.1371/journal.pone.0165053](https://doi.org/10.1371/journal.pone.0165053) PMID: [27760177](https://pubmed.ncbi.nlm.nih.gov/27760177/)

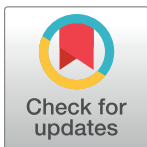

## OPEN ACCESS

**Citation:** Wu C-L, Zhong S, Chen H-C (2017) Correction: Discriminating the Difference between Remote and Close Association with Relation to White-Matter Structural Connectivity. PLoS ONE 12(1): e0171060. doi:[10.1371/journal.pone.0171060](https://doi.org/10.1371/journal.pone.0171060)

**Published:** January 25, 2017

**Copyright:** © 2017 Wu et al. This is an open access article distributed under the terms of the [Creative Commons Attribution License](https://creativecommons.org/licenses/by/4.0/), which permits unrestricted use, distribution, and reproduction in any medium, provided the original author and source are credited.
